# Supplementary material for: Pharmacokinetic Simulation Study: Exploring the Impact of Clinical Parameters on Lamotrigine for Different Patient Populations with Implications for Liver Function Assessment and Therapeutic Drug Monitoring
Source: MDPI journal article supplement (doi:10.3390/scipharm92010015), 2024-02-28
Supplement: s1 [file s1]

Supplementar material

**Table S1.** Summary of the SimPops simulated, including population sample size and the number of parameters varied.

| SimPops ID                         | Species/Strain             | Population Sample Size | Number of Parameters Varied |
|------------------------------------|----------------------------|------------------------|-----------------------------|
| Human_ROS_apop_mito_BA_v8A_1       | Human - healthy volunteers | 285                    | 44                          |
| Human_T2D_ROS_apop_mito_BA_v8A_3   | Human - Type 2 Diabetes    | 285                    | 47                          |
| Human_NAFLD_ROS_apop_mito_BA_v8A_4 | Human - NAFLD              | 275                    | 53                          |

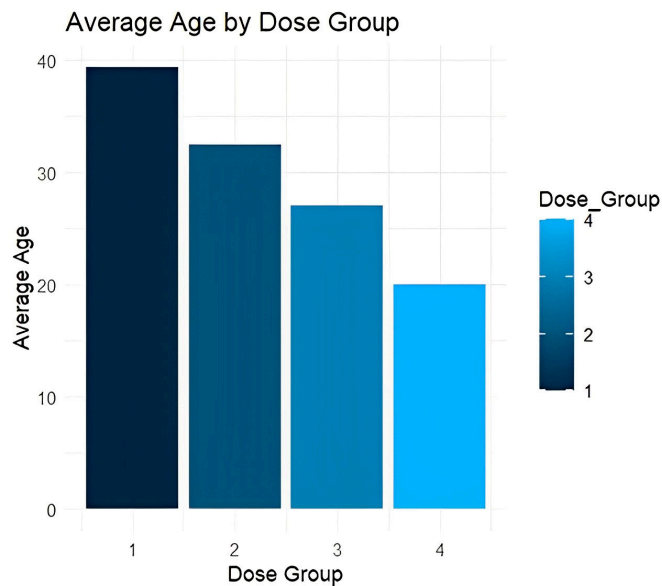

**Figure S1.** Distribution of the average age according to the different dose groups. The categories include: "Very Low - 1" group (doses < 100 mg) with a minimum dose of 20 mg, "Low - 2" group (doses between 100 and 200 mg), "Average - 3" group (doses between 200 and 400 mg) "High - 4" group (doses > 400 mg).
